# Supplementary material
Source: publisher figshare collection journal article supplement (https://scielo.figshare.com/articles/dataset/_/7216010)
Supplement: Supplementary file 1 [file Table_1.xls]

## Sheet: Table_1
<b>Crop</b>	<b>Target Gene</b>	<b>Plant phenotype</b>	<b>Reference</b>
Cabbage	<em>BoIC.GA4.a</em>	Dwarf phenotype	<a>Lawrenson <em>et al</em>. (2015</a>)
Carrot	Flavanone-3-hydroxylase (<em>DcF3H</em>)	Blockage of the anthocyanin biosynthesis in purple-colored carrot	<a>Klimek-Chodacka <em>et al</em>. (2018)</a>
Cucumber	Eukaryotic translation initiation factor 4E (<em>eIF4E</em>)	Resistance to Cucumber vein yellowing virus; Potyviruses Zucchini yellow mosaic virus; Papaya ring spot mosaic virus-W	<a>Chandrasekaran <em>et al</em>. (2016</a>)
Potato	Granule-bound starch synthase (<em>StGBSS</em>)	Starch with reduced amylose content and increase in the amylopectin/amylose ratio	<a>Andersson <em>et al</em>. (2017</a>, 2018)
	16α-hydroxylation (<em>St16DOX</em>)	Complete abolition of the steroidal glycoalkaloids accumulation	<a>Nakayasu <em>et al.</em> (2018</a>)
Strawberry	Auxin Response Factor 8 (<em>FvARF8</em>); Auxin biosynthesis gene (<em>FveTAA</em>1)	Increasing of auxin biosynthesis leading to faster growth of seedlings	<a>Zhou <em>et al.</em> (2018</a>)
Tomato	ARGONAUTE7 (<em>SlAGO7</em>)	First leaves having leaflets without petioles and later-formed leaves lacking laminae	<a>Brooks <em>et al.</em> (2014</a>)
	Ripening inhibitor (<em>RIN</em>)	Incomplete ripening fruits with reduced red color pigmentation	<a>Ito <em>et al.</em> (2015</a>)
	Blade-on-petiole (<em>SlBOP</em>)	Inflorescence defects	<a>Xu <em>et al.</em> (2016</a>)
	Aux/IAA9 (<em>SlIAA9</em>)	Morphological changes in leaf shape and seedless fruit	<a>Ueta <em>et al.</em> (2017</a>)
	SlAGAMOUS-LIKE 6 (<em>SlAGL6</em>)	Production of seedless fruits with normal weight and shape under heat stress	<a>Klap <em>et al.</em> (2017</a>)
	Self-pruning 5G (<em>SlSP5G</em>)	Loss of day-length-sensitive flowering, enhancement of the compact determinate growth habit and early yield	<a>Soyk <em>et al.</em> (2017)</a>
	Mildew resistant locus (SlMlo1)	Resistance to powdery mildew	<a>Nekrasov <em>et al.</em> (2017</a>)
	Alcobaça <em>(SLALC)</em>	Long-shelf life	<a>Yu <em>et al.</em> (2017</a>)
	Glutamate decarboxylase (SlGAD2 and SlGAD3)	Fruits with increased ɣ-aminobutyric acid (GABA) content	<a>Nonaka <em>et al.</em> (2017</a>)
	<em>lncRNA1459</em>	Fruits with ripening, ethylene production, and lycopene accumulation repressed	<a>Li <em>et al.</em> (2018</a>)
Watermelon	Phytoene desnaturase (<em>ClPDS</em>)	Albino phenotype	<a>Tian <em>et al.</em> (2016)</a>
